# Supplementary material
Source: MDPI journal article supplement (https://www.mdpi.com/2624-5647/5/1/1)
Supplement: s1 [file s1]

**Supplementary Table S1.** Statements 1 - What has influenced the decision not to participate (31 statements)

| <b>I did not participated because... [applicable yes or no]</b>                                              |
|--------------------------------------------------------------------------------------------------------------|
| 1. I kept postponing it                                                                                      |
| 2. I had other things in mind                                                                                |
| 3. The expire date of the FIT was expired                                                                    |
| 4. I was not interested in a preventive examination                                                          |
| 5. I already have/had cancer                                                                                 |
| 6. The FIT procedure failed                                                                                  |
| 7. I am afraid of getting cancer                                                                             |
| 8. I feared a positive FIT result (I feared to much blood in stool and the need for a follow-up colonoscopy) |
| 9. I felt good                                                                                               |
| 10. I had no complaints or symptoms                                                                          |
| 11. I have no family members with CRC                                                                        |
| 12. I thought a FIT was not meaningful for me                                                                |
| 13. CRC is not very common                                                                                   |
| 14. I did not knew how to use the FIT                                                                        |
| 15. I thought the instruction leaflet was unclear                                                            |
| 16. My Dutch is insufficient to comprehend the leaflet                                                       |
| 17. I perceived the sampling of my stool dirty                                                               |
| 18. I wanted to participate but postponed it due to medical reasons that could interfere with the FIT result |
| 19. I had visible blood in my stool                                                                          |
| 20. My GP did not talk with me about it                                                                      |
| 21. I don't want to know if I have cancer                                                                    |
| 22. I believed my personal health was not important                                                          |
| 23. I preferred a test from my GP                                                                            |
| 24. I did not participate because too personal/private                                                       |
| 25. CRC is not curable anyway                                                                                |
| 26. I did not participate because my partner did not either                                                  |
| 27. Someone in my direct environment (partner, children) discouraged me to do the FIT                        |
| 28. My GP discouraged me to participate                                                                      |
| 29. I did not participate because of costs related to possible follow-up examinations                        |
| 30. I did not had any trust in a free offered examination                                                    |
| 31. I did not participated because of my religion                                                            |

**Supplementary Table S2.** Statements 2 – What has influenced the decision to participate? (22 statements, delayed entrees only)

| <b>I participated because... [applicable yes or no]</b>                                |
|----------------------------------------------------------------------------------------|
| 1. I think preventing is better than curing                                            |
| 2. I thought my health is important                                                    |
| 3. If you detect it early, the chance of recovery increases                            |
| 4. I want to know it on time if I have cancer                                          |
| 5. If the government offers you the test, it should be important for my health         |
| 6. I received the test for the second time, so it probably is important                |
| 7. Someone in my direct environment (partner, child, friend) advised me to participate |
| 8. I participated because my partner also participated                                 |
| 9. My GP advised me to participate                                                     |
| 10. Someone I know was diagnosed with CRC                                              |
| 11. I participated because with someone I know they found something with this test     |
| 12. I am afraid of getting cancer                                                      |
| 13. I already have/had cancer                                                          |
| 14. CRC is a common cancer                                                             |
| 15. I have an increased risk to get CRC because of CRC in my family                    |
| 16. It is a test that I can do at home                                                 |
| 17. The test is easy                                                                   |
| 18. The test is free                                                                   |
| 19. I was convinced to participate by reading a news article or poster                 |
| 20. I was convinced to participate by a TV advertisement                               |
| 21. I was convinced to participate after attending an information event about CRC      |
| 22. I participated because of my religion                                              |

**Supplementary Table S3.** Statements 3: Opinions about the GP role, information in the invitation and leaflet (11 statements)

|                                                                                                       |                                                                                                           |
|-------------------------------------------------------------------------------------------------------|-----------------------------------------------------------------------------------------------------------|
| <b>Opinions about the GP role, information in invitation and leaflet</b>                              |                                                                                                           |
| <b>Answering categories: disagree strongly disagree OR neutral/no opinion OR agree/strongly agree</b> |                                                                                                           |
| 1.                                                                                                    | The invitation and leaflet contain enough information to make myself decide whether or not to participate |
| 2.                                                                                                    | After receiving the FIT invitation I needed more information from my GP/doctor                            |
| 3.                                                                                                    | After reading the FIT invitation and leaflet I still had some questions                                   |
| 4.                                                                                                    | Leaflet provides sufficient explanation about the importance of repeating the test every two years        |
| 5.                                                                                                    | Leaflet provides enough information about disadvantages of the test                                       |
| 6.                                                                                                    | Leaflet provides enough information about advantages of the test                                          |
| 7.                                                                                                    | Instructions are clear enough to take a stool sample                                                      |
| 8.                                                                                                    | I am aware that I can request a new test for free                                                         |
| 9.                                                                                                    | My GP should mention the FIT invitation spontaneously with his/her patients                               |
| 10.                                                                                                   | If my GP would advise the FIT, I would participated earlier                                               |
| 11.                                                                                                   | CRC screening program should be more publicized through media                                             |

**Supplementary Table S4.** Gender difference between the response and non-response groups to the survey

|               | <b>Response</b> | <b>Non-response</b> | <b>P-value (Fisher exact)</b> |
|---------------|-----------------|---------------------|-------------------------------|
| <b>Male</b>   | 2932 (55.0%)    | 7256 (51.0%)        | <0.001                        |
| <b>Female</b> | 2396 (45.0%)    | 6959 (49.0%)        |                               |

**Supplementary Table S5.** Age difference between the response and non-response groups to the survey

|              | <b>Response</b> | <b>Non-response</b> | <b>P-value (Fisher exact)</b> |
|--------------|-----------------|---------------------|-------------------------------|
| <b>59-64</b> | 3085 (57.9%)    | 7203 (50.7%)        | < 0.001                       |
| <b>65-69</b> | 1479 (27.8%)    | 3974 (28.0%)        |                               |
| <b>70-75</b> | 764 (14.3%)     | 3038 (21.3%)        |                               |

**Supplementary Table S6.** Postcode difference (first 2 digits) between the response and non-response groups to the survey

| Postcode first 2 digits | Response | %    | Non-response | %    | P-value (Fisher exact) |
|-------------------------|----------|------|--------------|------|------------------------|
| 29                      | 291      | 5.46 | 702          | 4.94 | < 0.001                |
| 90                      | 273      | 5.12 | 577          | 4.06 |                        |
| 28                      | 213      | 4.00 | 469          | 3.30 |                        |
| 30                      | 208      | 3.90 | 512          | 3.60 |                        |
| 35                      | 203      | 3.81 | 598          | 4.21 |                        |
| 91                      | 188      | 3.53 | 518          | 3.64 |                        |
| 21                      | 187      | 3.51 | 463          | 3.26 |                        |
| 36                      | 174      | 3.27 | 465          | 3.27 |                        |
| 26                      | 173      | 3.25 | 499          | 3.51 |                        |
| 25                      | 169      | 3.17 | 433          | 3.05 |                        |
| 92                      | 165      | 3.10 | 410          | 2.88 |                        |
| 20                      | 164      | 3.08 | 392          | 2.76 |                        |
| 22                      | 162      | 3.04 | 394          | 2.77 |                        |
| 84                      | 161      | 3.02 | 468          | 3.29 |                        |
| 39                      | 159      | 2.98 | 401          | 2.82 |                        |
| 17                      | 147      | 2.76 | 403          | 2.84 |                        |
| 23                      | 145      | 2.72 | 392          | 2.76 |                        |
| 85                      | 143      | 2.68 | 388          | 2.73 |                        |
| 24                      | 135      | 2.53 | 305          | 2.15 |                        |
| 98                      | 135      | 2.53 | 333          | 2.34 |                        |
| 83                      | 113      | 2.12 | 373          | 2.62 |                        |
| 88                      | 106      | 1.99 | 347          | 2.44 |                        |
| 31                      | 103      | 1.93 | 201          | 1.41 |                        |
| 99                      | 99       | 1.86 | 327          | 2.30 |                        |
| 18                      | 98       | 1.84 | 341          | 2.40 |                        |
| 87                      | 93       | 1.75 | 352          | 2.48 |                        |
| 32                      | 91       | 1.71 | 236          | 1.66 |                        |
| 37                      | 90       | 1.69 | 216          | 1.52 |                        |
| 33                      | 89       | 1.67 | 215          | 1.51 |                        |
| 86                      | 89       | 1.67 | 294          | 2.07 |                        |
| 80                      | 84       | 1.58 | 152          | 1.07 |                        |
| 19                      | 83       | 1.56 | 216          | 1.52 |                        |
| 93                      | 82       | 1.54 | 218          | 1.53 |                        |
| 89                      | 73       | 1.37 | 266          | 1.87 |                        |
| 94                      | 68       | 1.28 | 211          | 1.48 |                        |
| 38                      | 60       | 1.13 | 181          | 1.27 |                        |
| 16                      | 53       | 0.99 | 208          | 1.46 |                        |
| 82                      | 50       | 0.94 | 124          | 0.87 |                        |
| 15                      | 48       | 0.90 | 125          | 0.88 |                        |
| 34                      | 48       | 0.90 | 86           | 0.61 |                        |
| 96                      | 46       | 0.86 | 177          | 1.25 |                        |
| 97                      | 35       | 0.66 | 97           | 0.68 |                        |
| 95                      | 32       | 0.60 | 130          | 0.91 |                        |
